# Supplementary material for: Synthesis and mesomorphic properties of calamitic malonates and cyanoacetates tethered to 4-cyanobiphenyls
Source: publisher site journal article supplement (doi:10.3762/bjoc.8.40), 2012-03-09
Supplement: Additional file 1 [file 1860-5397-8-40-S1.pdf]

**Supporting Information**  
**for**  
**Synthesis and mesomorphic properties of calamitic**  
**malonates and cyanoacetates tethered to**  
**4-cyanobiphenyls**

Katharina C. Kress, Martin Kaller, Kirill V. Axenov, Stefan Tussetschläger and  
Sabine Laschat\*

Address: Institut für Organische Chemie, Universität Stuttgart, Pfaffenwaldring 55,  
70569 Stuttgart, Germany

Email: Stefan Tussetschläger - stefan.tussetschlaeger@oc.uni-stuttgart.de; Sabine  
Laschat\* - Sabine.Laschat@oc.uni-stuttgart.de

\* Corresponding author

**Full experimental procedures and DSC traces of 11b and 13b.**

Table of Contents

|                         |    |
|-------------------------|----|
| Experimental procedures | S2 |
| DSC studies             | S5 |
| References              | S6 |



## Experimental procedures

### 6-bromohexan-1-ol (**7a**)

A solution of HBr in water (48 wt %, 5.6 mL, 50.8 mmol) was slowly added to a solution of hexan-1,6-diol (**6a**) (5.00 g, 42.3 mmol) in toluene (50 mL). The reaction mixture was heated under reflux for 48 h. After being cooled to rt, the organic and water phases were separated. The organic phase was diluted with Et<sub>2</sub>O (30 mL), washed with aqueous NaOH (saturated solution in water, 50 mL), then with aqueous NaCl (saturated solution in water, 50 mL), dried over MgSO<sub>4</sub> and evaporated under reduced pressure. The crude product was purified by column chromatography on silica gel (hexanes/EtOAc, 1:1) to give **7a** as a yellow oil (5.45 g, 30.3 mmol, 72%).

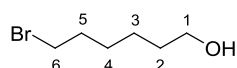

<sup>1</sup>H NMR (500 MHz, CDCl<sub>3</sub>) δ 1.22–1.24 (m, 1H, OH), 1.36–1.43 (m, 2H, 3-H), 1.44–1.50 (m, 2H, 4-H), 1.56–1.61 (m, 2H, 2-H), 1.85–1.90 (m, 2H, 5-H), 3.14 (t, *J* = 6.7 Hz, 2H, 6-H), 3.64–6.67 (m, 2H, 1-H) ppm; <sup>13</sup>C NMR (125 MHz, CDCl<sub>3</sub>) δ 24.9 (C-3), 27.9 (C-4), 32.5 (C-2), 32.7 (C-5), 33.8 (C-6), 62.8 (C-1) ppm; *R<sub>f</sub>* 0.40 (hexanes/EtOAc, 3:1, potassium permanganate). The obtained spectroscopic data are in accordance with the literature [1].

### 10-bromodecan-1-ol (**7b**)

Aqueous HBr (48 wt % solution in water, 3.8 mL, 34.4 mmol) was slowly added to a solution of decan-1,6-diol (**6b**) (5.00 g, 28.7 mmol) in toluene (50 mL). The reaction mixture was heated under reflux for 48 h. After being cooled to rt, the organic and water phases were separated. The organic phase was diluted with Et<sub>2</sub>O (30 mL), washed with aqueous NaOH (saturated solution in water, 50 mL), then with aqueous NaCl (saturated solution in water, 50 mL), dried over MgSO<sub>4</sub> and evaporated under



reduced pressure. The crude product was purified by column chromatography on silica gel (hexanes/EtOAc, 3:1) to give **7b** as a yellow oil (3.86 g, 16.3 mmol, 57%).

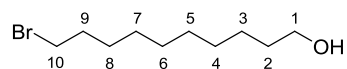

$^1\text{H}$  NMR (500 MHz,  $\text{CDCl}_3$ )  $\delta$  1.27–1.38 (m, 11H, OH, 3-H, 4-H, 5-H, 6-H, 7-H), 1.39–1.43 (m, 2H, 8-H), 1.53–1.5 (m, 2H, 2-H), 1.83–1.88 (m, 2H, 9-H), 3.40 (t,  $J$  = 6.6 Hz, 2H, 10-H), 3.62–6.65 (m, 2H, 1-H) ppm;  $^{13}\text{C}$  NMR (125 MHz,  $\text{CDCl}_3$ )  $\delta$  25.7 (C-3), 28.1 (C-8), 28.7–29.4 (C-4, C-5, C-6, C-7), 32.7, 32.8 (C-2, C-9), 34.0 (C-10), 63.0 (C-1) ppm;  $R_f$  0.59 (hexanes/EtOAc, 3:1, potassium permanganate). The obtained spectroscopic data are in accordance with the literature [1].

#### 4'-((6-hydroxyhexyl)oxy)-[1,1'-biphenyl]-4-carbonitrile (**9a**)

A mixture of 6-bromohexan-1-ol (**7a**) (869 mg, 4.80 mmol), 4'-cyano-4-hydroxybiphenyl (**8**) (936 mg, 4.80 mmol) and potassium carbonate (1.33 g, 9.60 mmol) in abs. acetone (20 mL) was heated under reflux for 24 h. All volatiles were removed under vacuum and the residue was recrystallized from methanol (15 mL, hot filtrated from potassium carbonate) to give **9a** as a colourless solid (959 mg, 3.20 mmol, 68%).

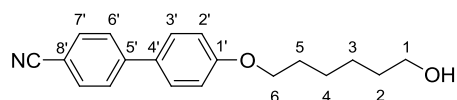

$^1\text{H}$  NMR (500 MHz,  $\text{CDCl}_3$ )  $\delta$  1.42–1.50 (m, 2H, 3-H), 1.50–1.57 (m, 2H, 4-H), 1.59–1.66 (m, 2H, 2-H), 1.80–1.87 (m, 2H, 5-H), 3.67 (t,  $J$  = 6.6 Hz, 2H, 1-H), 4.01 (t,  $J$  = 6.6 Hz, 2H, 6-H), 6.99 (d,  $J$  = 8.6 Hz, 2H, 2'-H), 7.52 (d,  $J$  = 8.6 Hz, 2H, 3'-H), 7.64 (d,  $J$  = 8.6 Hz, 2H, 6'-H), 7.90 (d,  $J$  = 8.6 Hz, 2H, 7'-H) ppm;  $^{13}\text{C}$  NMR (125 MHz,  $\text{CDCl}_3$ )  $\delta$  25.5 (C-4), 25.9 (C-3), 29.2 (C-5), 32.7 (C-2), 62.9 (C-1), 68.0 (C-6), 110.5 (C-8'), 115.1 (C-2'), 119.1 (CN), 127.2 (C-6'), 128.3 (C-3'), 131.3 (C-5'), 132.5 (C-7'), 145.3



(C-4'), 159.7 (C-1') ppm;  $R_f$  0.22 (hexanes/EtOAc, 2:1, potassium permanganate). The obtained spectroscopic data are in accordance with the literature [2].

#### 4'-((10-hydroxydecyl)oxy)-[1,1'-biphenyl]-4-carbonitrile (**9b**)

A mixture of 10-bromodecan-1-ol (**7a**) (2.37 g, 10 mmol), 4'-cyano-4-hydroxybiphenyl (**8**) (936 mg, 4.80 mmol) and potassium carbonate (2.76 g, 10 mmol) in abs. acetone (30 mL) was heated under reflux for 24 h. All volatiles were removed under vacuum and the residue was recrystallized from methanol (25 mL, hot filtrated from potassium carbonate) to give **9b** as a colourless solid (2.11 g, 6.00 mmol, 60%).

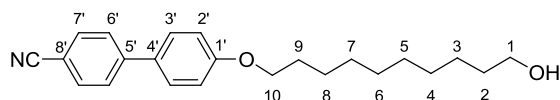

$^1\text{H}$  NMR (500 MHz,  $\text{CDCl}_3$ )  $\delta$  1.21 (t,  $J = 5.2$  Hz, 1H, OH), 1.32–1.36 (m, 10H, 3-H, 4-H, 5-H, 6-H, 7-H), 1.44–1.50 (m, 2H, 8-H), 1.54–1.58 (m, 2H, 2-H), 1.77–1.83 (m, 2H, 9-H), 3.62–3.65 (m, 2H, 1-H), 3.99–4.01 (m, 2H, 10-H), 6.97–6.99 (m, 2H, 2'-H), 7.52–7.54 (m, 2H, 3'-H), 7.63–7.69 (m, 4H, 6'-H, 7'-H) ppm;  $^{13}\text{C}$  NMR (125 MHz,  $\text{CDCl}_3$ )  $\delta$  25.7 (C-7), 26.0 (C-8), 29.21 (C-9), 29.35–29.50 (C-3, C-4, C-5, C-6), 32.7 (C-2), 63.0 (C-1), 68.1 (C-10), 110.0 (C-8'), 115.0 (C-2'), 119.1 (CN), 127.0 (C-6'), 128.3 (C-3'), 131.3 (C-5'), 132.5 (C-7'), 145.3 (C-4'), 159.7 (C-1') ppm;  $R_f$  0.66 (hexanes/EtOAc, 2:1, potassium permanganate). The obtained spectroscopic data are in accordance with the literature [3].



## DSC studies

DSC traces of compounds **11b** and **13b**

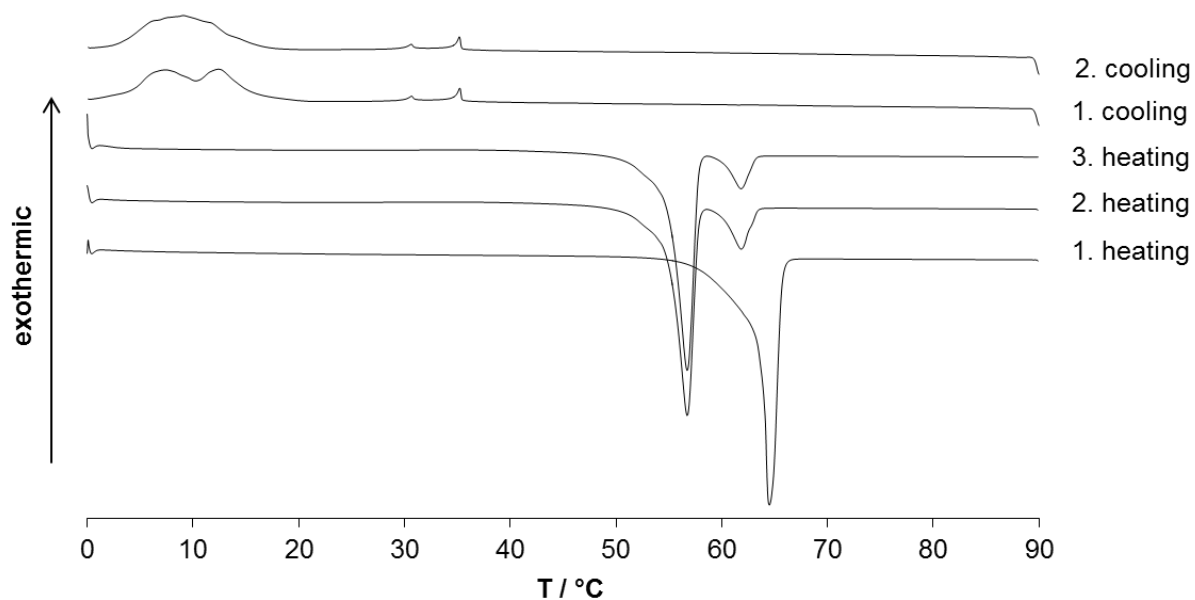

**Figure S1:** DSC traces of **11b** (heating/cooling rate 5 K/min).

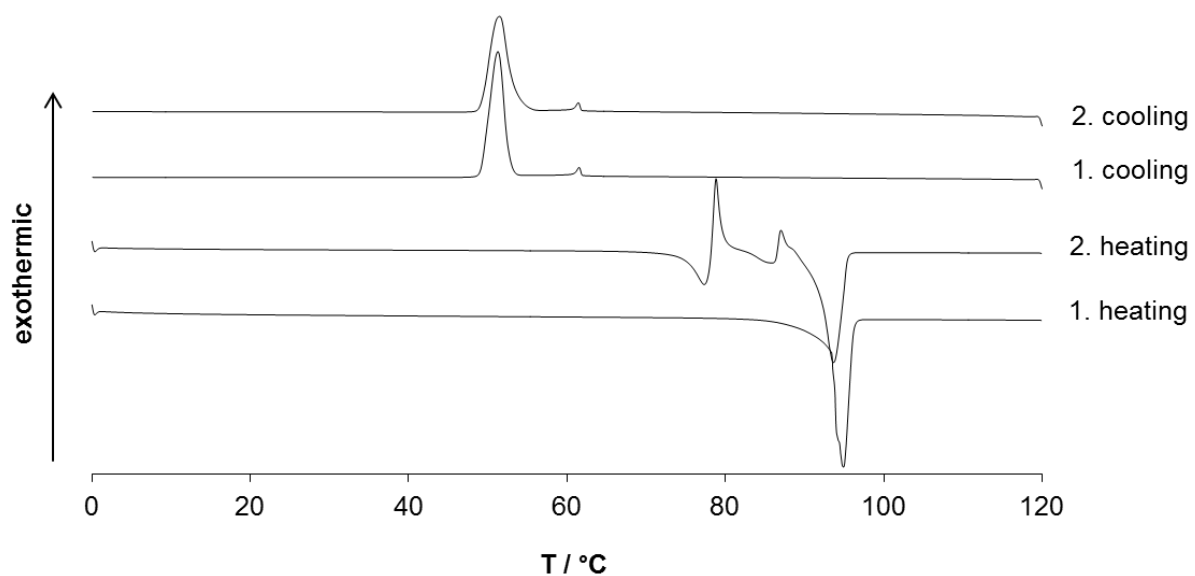

**Figure S2:** DSC traces of **13b** (heating/cooling rate 5 K/min).



## References

1. Chong, J. M.; Heuft, M. A.; Rabbat, F. *J. Org. Chem.* **2000**, *65*, 5837–5838.
2. Sahade, D. A. Polymerizable Liquid Crystal Compound, Polymerizable Liquid Crystal Composition, and Alignment Film. EP 2062882, May 27, 2009.
3. Nakatsuji, S.; Ikemoto, H.; Akutsu, H.; Yamada, J.; Mori, A. *J. Org. Chem.* **2003**, *68*, 1708–1714.
